Three species of *Melaleuca* from Western Australia are highly susceptible to *Austropuccinia psidii* in controlled inoculations

A. M. Martino, R. F. Park, P. A. Tobias

<sup>1</sup>School of Life and Environmental Sciences, The University of Sydney, Camperdown NSW 2006, Australia, <sup>2</sup>Plant Breeding Institute, University of Sydney, Narellan NSW 2567, Australia

Alyssa M Martino<sup>1</sup> [alyssa.martino@sydney.edu.au](mailto:alyssa.martino@sydney.edu.au) ORCID: 0000-0002-5062-3578

Robert F Park<sup>2</sup> [robert.park@sydney.edu.au](mailto:robert.park@sydney.edu.au) ORCID: 0000-0002-9145-5371

Peri A Tobias<sup>1</sup> [peri.tobias@sydney.edu.au](mailto:peri.tobias@sydney.edu.au) ORCID: 0000-0002-5645-0161

## Abstract

*Austropuccinia psidii*, the fungus causing myrtle rust, was detected in Western Australia for the first time in June 2022. Few Western Australian plant species have been screened for response to the pathogen. *Melaleuca thyoides*, *Melaleuca marginata* and *Melaleuca leucadendra* grown from seeds sourced from Western Australian populations were all highly susceptible to an isolate of the pathogen from eastern Australia.

## Keywords

*Austropuccinia psidii* - myrtle rust – Western Australia - *Melaleuca*

*Austropuccinia psidii* (G. Winter) Beenken comb. nov., formerly *Puccinia psidii* (Beenken 2017) is the causal agent of myrtle rust and has been present in Australia since 2010 (Carnegie et al. 2010). Causing disease on species within the family Myrtaceae, it is present in New South Wales and Queensland (Carnegie et al. 2010; Carnegie and Lidbetter 2012; Pegg et al. 2014; Carnegie and Pegg 2018), Victoria (Agriculture Victoria 2022), Tasmania (Department of Natural Resources and Environment Tasmania 2020), the Northern Territory (Westaway 2016), and was most recently detected in Northern Western Australia (Agriculture and Food 2022).

Since the incursion into Australia, *A. psidii* has already caused the decline of keystone Myrtaceae including *Melaleuca quinquenervia* (Cav.) S.T.Blake and several rainforest understory species such as *Rhodamnia rubescens* (Benth.) Miq. and *Rhodomyrtus psidioides* (G.Don) Benth. (Carnegie et al. 2010; Carnegie and Lidbetter 2012; Pegg et al. 2014). Natural infections and pathogenicity testing has revealed over 345 susceptible species in Australia (Carnegie and Pegg 2018). Of particular concern is the susceptibility of species within Myrtaceae rich biodiversity hotspots such as that of South-West Western Australia, where myrtle rust has not yet been detected (Myers et al., 2000; Beard et al., 2000).

*Melaleuca* species are widely distributed throughout Western Australia, providing a range of ecosystem functions (Brophy et al. 2013). Previous screening of *Melaleuca* species against *A. psidii* has shown a variability in susceptibility to the pathogen (Pegg et al. 2018). As few Western Australian *Melaleuca* species have been tested for their response to *A. psidii*, the threat to these species remains largely unknown. With the recent detection of the pathogen in the Kimberley region of Western Australia on two *Melaleuca* species, yet to be formally identified (Agriculture and Food

2022), there is an urgent need to determine the vulnerability of species from Western Australia to aid conservation efforts.

To determine susceptibility of *Melaleuca* species from Western Australia in response to the pathogen, seed from *Melaleuca thuyoides* Turcz. and *Melaleuca marginata* (Sond.) Hislop, Lepschi & Craven was obtained from Department of Biodiversity, Conservation and Attractions King's Park seed bank. Although known to be susceptible (Pegg et al. 2018), seed from and *Melaleuca leucadendra* (L.) (L.) was also obtained as the isolated population not been assessed for susceptibility. For each species, seed was collected from multiple trees at 33°39'45"S 115°20'59"E, 29°07'21.9"S 115°05'46.8"E, and 16°47'10.0"S 124°55'14.5"E respectively (Figure 1).

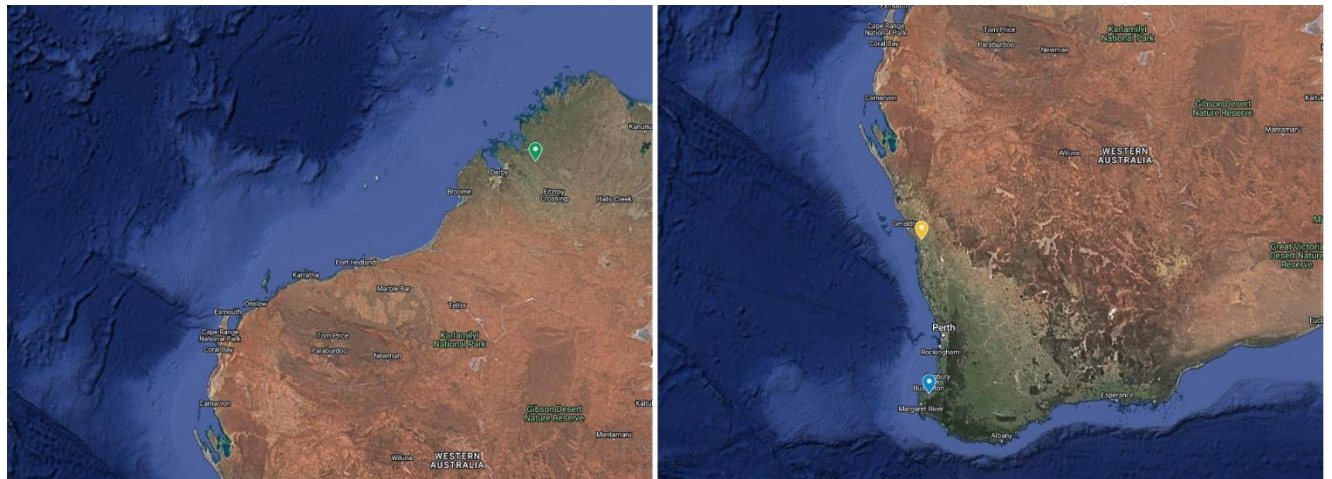

Figure 1. Seed collection sites for *Melaleuca leucadendra* (green tag), *Melaleuca thuyoides* (yellow tag), and *Melaleuca marginata* (blue tag). Seed was collected from multiple parents at each site. Image generated in Google My Maps.

Seeds were sown into perforated trays containing a mix of 2:1:1 peat, coconut coir, and perlite supplemented with Osmocote® Native Controlled Release Fertiliser then covered with a fine coating of vermiculite. Perforated trays were placed into solid trays filled with and always maintaining 1 cm of water. Seeds were germinated under natural light in a climate-controlled glasshouse set at 26°C/20°C daytime/night time temperature on a 12 hour cycle. Germinated seedlings were transplanted into 85 mL pots (5 cm diameter and depth) containing a mix of 2:1:1 Osmocote® Native Premium Potting Mix, peat, and perlite supplemented with Osmocote® Native Controlled Release Fertiliser then placed in solid trays filled with and always maintaining 1 cm of water. Seedlings were grown under the same glasshouse conditions as for germination.

67

68 Inoculation of 57 *M. thuyoides*, 26 *M. marginata* and 51 *M. leucadendra* was conducted three months  
69 post germination at the Plant Breeding Institute at the University of Sydney (Cobbitty, NSW)  
70 alongside a known highly susceptible host *Syzygium jambos* as a positive control. Approximately 50  
71 mg of *A. psidii* urediniospores from a single isolate (Sandhu and Park 2013) was added to 50 mL of  
72 Isopar® for a final concentration of 1 mg spores/mL. Seedlings were inoculated with inoculum using  
73 an aerosol sprayer and relocated to a humid incubation chamber for 24 hours at 20°C. After  
74 incubation, seedlings were transferred to a glasshouse with the temperature set to 26°C/20°C  
75 daytime/nighttime temperature on a 12 hour cycle.

76

77 Within 12 days post inoculation, symptoms had developed on highly susceptible plants. Plants were  
78 scored using the system developed by Morin et al. (2012), ranging from completely resistant (score  
79 1) to highly susceptible (score 5). For all species, spores appeared on leaves, stems, and petioles in  
80 highly susceptible plants (Figure 2). The highest level of susceptibility was recorded in *M. marginata*  
81 with 76.9% of plants highly susceptible and 23.1% showing no symptoms (Table 1). While the  
82 majority of *M. leucadendra* assessed were highly susceptible (62.8%), some plants showed no signs  
83 of infection (29.4%) while others showed variable levels of response to the pathogen (Table 1).  
84 35.1% of *M. thuyoides* assessed were highly susceptible with 45.6% showing no symptoms and others  
85 showing variable response to the pathogen (Table 1).

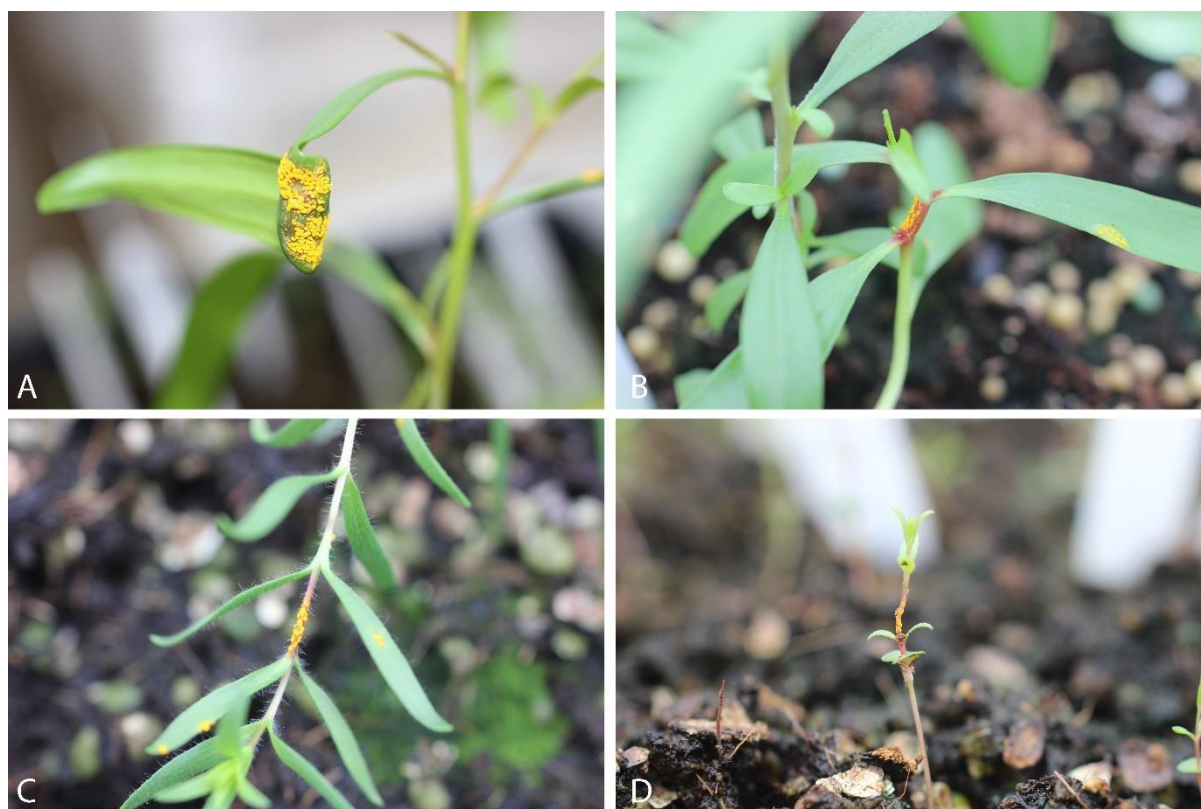

Figure 2. Disease symptoms of controlled inoculation of *Austropuccinia psidii* on (A, B) *Melaleuca leucadendra*, (C) *Melaleuca marginata*, and (D) *Melaleuca thyoides* at 14 days post inoculation.

Table 1. Disease scoring, based on Morin et al. (2012), of controlled inoculation of *Austropuccinia psidii* of *Melaleuca thyoides*, *Melaleuca marginata*, *Melaleuca leucadendra* and the percentage of plants observed in each disease scoring category.

| Disease Score | Number and Percentage of Plants Scored |                           |                              |
|---------------|----------------------------------------|---------------------------|------------------------------|
|               | <i>Melaleuca marginata</i>             | <i>Melaleuca thyoides</i> | <i>Melaleuca leucadendra</i> |
| 1             | 6 (23.1%)                              | 26 (45.6%)                | 15 (29.4%)                   |
| 2             | 0                                      | 1 (1.8%)                  | 1 (2.0%)                     |
| 3             | 0                                      | 4 (7.0%)                  | 2 (3.9%)                     |
| 4             | 0                                      | 6 (10.5%)                 | 1 (2.0%)                     |
| 5             | 20 (76.9%)                             | 20 (35.1%)                | 32 (62.8%)                   |

These results indicate a high level of susceptibility in all three species to *A. psidii*, and for the first time reveal susceptibility in *M. thyoides* and *M. marginata*. With the pathogen now present within



Western Australia, these results highlight the need to monitor myrtaceous species in the native ecosystem. The results also underscore the importance of screening more Western Australian species to determine their vulnerability to the pathogen to aid conservation efforts.

## Acknowledgements

This work was funded by the Australian Research Council under linkage project LP190100093 and The University of Sydney. Thank you to the Department of Biodiversity, Conservation and Attractions (King's Park) for supplying the seed for this work. Thank you to Bob Makinson for the introductions that facilitated this work going ahead.

## Conflict of interest

The authors declare no conflict of interest in the reporting of these results.

## References

- Agriculture and Food (2022) Myrtle rust: Biosecurity alert. <https://www.agric.wa.gov.au/plant-biosecurity/myrtle-rust-threat-western-australia?page=0%2C1>. Accessed 14 Jul 2022
- Agriculture Victoria (2022) About myrtle rust. <https://agriculture.vic.gov.au/biosecurity/plant-diseases/shrub-and-tree-diseases/myrtle-rust/about-myrtle-rust>. Accessed 14 Jul 2022
- Beard JS, Chapman AR, Gioia P (2000) Species richness and endemism in the Western Australian flora. *Journal of Biogeography* 27:1257–1268. <https://doi.org/10.1046/j.1365-2699.2000.00509.x>
- Beenken L (2017) *Austropuccinia*: a new genus name for the myrtle rust *Puccinia psidii* placed within the redefined family Sphaerophragmiaceae (Pucciniales). *Phytotaxa* 297:53–61–53–61. <https://doi.org/10.11646/PHYTOTAXA.297.1.5>
- Brophy JJ, Craven LA, Doran JC (2013) *Melaleucas: their botany, essential oils and uses*. ACIAR Monograph 156:415 pp.
- Carnegie AJ, Glen M, Mohammed C (2010) Rapid screening of commercial forestry species to *Uredo rangellii* (myrtle rust) and distinguishing *U. rangellii* from *Puccinia psidii* (guava rust)
- Carnegie AJ, Lidbetter JR (2012) Rapidly expanding host range for *Puccinia psidii* sensu lato in Australia. *Australasian Plant Pathology* 41:13–29. <https://doi.org/10.1007/s13313-011-0082-6>
- Carnegie AJ, Pegg GS (2018) Lessons from the incursion of myrtle rust in Australia. *Annual Review of Phytopathology* 56:457–478. <https://doi.org/10.1146/annurev-phyto-080516-035256>

129 Department of Natural Resources and Environment Tasmania (2020) Plant species affected by myrtle  
130 rust in Tasmania . [https://nre.tas.gov.au/biosecurity-tasmania/plant-biosecurity/pests-and-](https://nre.tas.gov.au/biosecurity-tasmania/plant-biosecurity/pests-and-diseases/myrtle-rust/plant-species-affected-by-myrtle-rust-in-tasmania)  
131 [diseases/myrtle-rust/plant-species-affected-by-myrtle-rust-in-tasmania](https://nre.tas.gov.au/biosecurity-tasmania/plant-biosecurity/pests-and-diseases/myrtle-rust/plant-species-affected-by-myrtle-rust-in-tasmania). Accessed 14 Jul 2022

132 Morin L, Aveyard R, Lidbetter JR, Wilson PG (2012) Investigating the host-range of the rust fungus  
133 *puccinia psidii* sensu lato across tribes of the family myrtaceae present in australia. PLoS ONE  
134 7:. <https://doi.org/10.1371/journal.pone.0035434>

135 Myers N, Mittermeyer RA, Mittermeyer CG, et al (2000) Biodiversity hotspots for conservation  
136 priorities. Nature 403:853–858. <https://doi.org/10.1038/35002501>

137 Pegg GS, Giblin FR, McTaggart AR, et al (2014) *Puccinia psidii* in Queensland, Australia: disease  
138 symptoms, distribution and impact. Plant Pathology 63:1005–1021.  
139 <https://doi.org/10.1007/s10530-015-0996-y>

140 Pegg GS, Lee DJ, Carnegie AJ (2018) Predicting impact of *Austropuccinia psidii* on populations of  
141 broad leaved *Melaleuca* species in Australia. Australasian Plant Pathology 47:421–430.  
142 <https://doi.org/10.1007/s13313-018-0574-8>

143 Sandhu KS, Park RF (2013) Genetic basis of pathogenicity in *Uredo rangelii*

144 Westaway JO (2016) The pathogen Myrtle Rust (*Puccinia psidii*) in the Northern Territory: First  
145 detection, new host and potential impacts. Northern Territory Naturalist 27:13–28.  
146 <https://doi.org/10.3316/INFORMIT.426544422268311>

147
